# Supplementary material for: Adaptation of Mouse Skeletal Muscle to Long-Term Microgravity in the MDS Mission
Source: PubMed Central journal article supplement (PMC3314659; doi:10.1371/journal.pone.0033232), 2012-03-28

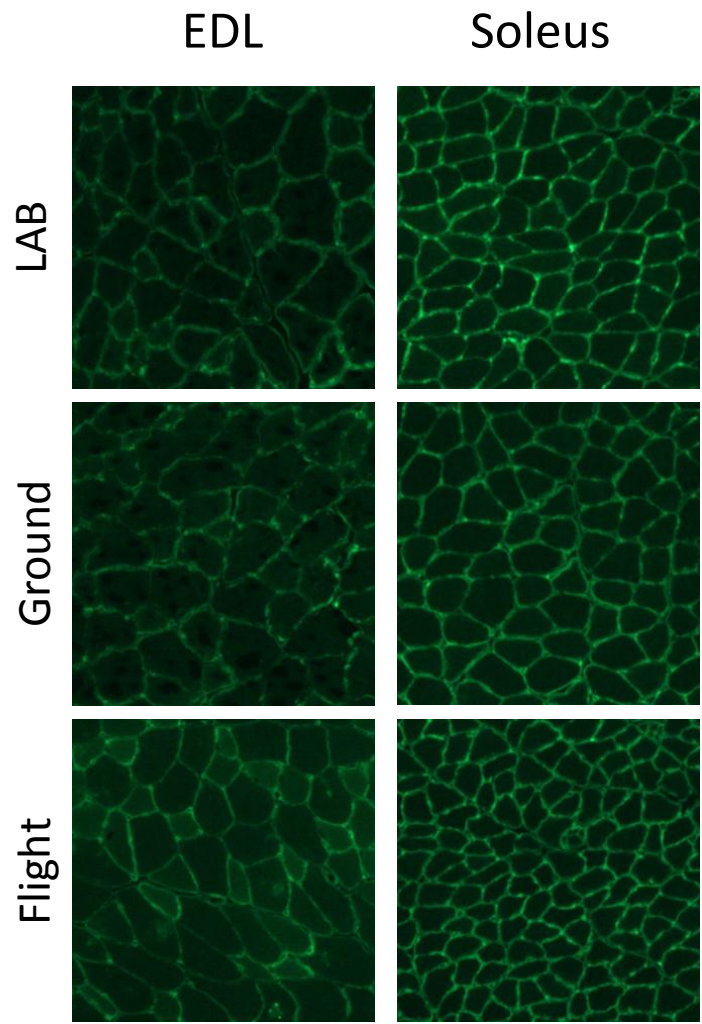

Supplement: pone.0033232.s003.pdf [file pone.0033232.s003.pdf]
