# Supplementary material for: Adaptation of Mouse Skeletal Muscle to Long-Term Microgravity in the MDS Mission
Source: PLoS One. 2012 Mar 28;7(3):e33232. doi: 10.1371/journal.pone.0033232 (PMC3314659; doi:10.1371/journal.pone.0033232)
Supplement: Table S1 — Quantitative real-time PCR primers and conditions. RT-PCR primers and techniques utilized to quantitate the expression of the indicated genes. Transcript levels of genes were quantitated either by SYBR Green or Taq polymerase method. HK genes, housekeeping genes; bp, expected product size; T°, annealing temperature. (PDF) [file pone.0033232.s005.pdf]

**TABLE S1** - Quantitative real-time PCR primers and conditions.

| Protein <sup>a</sup>                                    | Genes           | Sequence NCBI  | Probe Taqman                | Forward primer (5' → 3') | Reverse primer (3' → 5')  | bp  | T <sup>o</sup> |
|---------------------------------------------------------|-----------------|----------------|-----------------------------|--------------------------|---------------------------|-----|----------------|
| <b>HK GENES</b>                                         |                 |                |                             |                          |                           |     |                |
| β-actin                                                 | <i>Actb</i>     | NM_007393.3    | NA                          | CAAAACATCCCCAAAGTTCTAC   | TGAGGGACTTCCTGTAACCACT    | 135 | 57.7           |
| cyclophilin A                                           | <i>Ppia</i>     | NC_000077.5    | NA                          | AGCATGTGGTCTTTGGGAAGGTG  | CTTCTTGCTGGTCTTGCCATTCC   | 92  | 57.7           |
| GAPDH                                                   | <i>Gapdh</i>    | NM_008084.2    | NA                          | TGTGTCCGTCGTGGATCTGA     | TTGCTGTTGAAGTCGAGGAG      | 150 | 55.3           |
| HGPT                                                    | <i>Hprt</i>     | NM_013556.2    | Mm_0044698_m1 <sup>b</sup>  | Unknown                  | Unknown                   | 65  | NA             |
| <b>SPECIFIC GENES</b>                                   |                 |                |                             |                          |                           |     |                |
| Murf-1 E3 ligase                                        | <i>Trim63</i>   | NM_001039048.2 | NA                          | ACCTGCTGGTGGAAAACATC     | CTTCGTGTTCTTGACATC        | 96  | 55             |
| Atrogin-1 E3 ligase                                     | <i>Fbxo32</i>   | NM_026346.2    | NA                          | GCAAACTGCCACATTCTCTC     | CTTGAGGGGAAAGTGAGACG      | 93  | 55             |
| LC3β                                                    | <i>Map1lc3b</i> | NM_026160.4    | NA                          | CACTGCTCTGCTTGTGTAGGTTG  | TCGTTGTGCCTTTATTAGTGATC   | 171 | 57.7           |
| Cathepsin L                                             | <i>Ctsl</i>     | NM_001912      | NA                          | GTGGACTGTTCTCACGTCCAAG   | TCCGTCCTTCGCTTCATAGG      | 128 | 57.7           |
| PGC1-α                                                  | <i>Ppargc1a</i> | NM_013261.3    | NA                          | GGAATGCACCGTAAATCTGC     | TTCTCAAGAGCAGCGAAAGC      | 88  | 55             |
| Osgin 2                                                 | <i>Osgin2</i>   | NM_145950.3    | NA                          | CCTTACTGCTCGAGATGGTCCAA  | AAACGTCAGGGACTACACGCATAAC | 122 | 47.5           |
| Stress-associated ER protein                            | <i>Serp1</i>    | NM_030685.3    | NA                          | TGCCTTGTGAAACATGTGGA     | GACCTAGAACCCTAAGGGCATTTC  | 124 | 39.5           |
| HERP                                                    | <i>Herpud1</i>  | NM_022331.1    | NA                          | TCAAGTGATGGTTTACGGCAAAGA | CACCATACGTTGTGTAGCCAGAG   | 140 | 54.3           |
| PERK                                                    | <i>Eif2ak3</i>  | NM_010121.2    | NA                          | TATGCTACGCACACGGGACAA    | ACTCGTTCATCTGGGTGCTG      | 152 | 46.7           |
| Bip (GRP78)                                             | <i>Hspa5</i>    | NM_022310.2    | NA                          | CTCCACGGCTTCCGATAATCA    | TCCAGTCAGATCAAATGTACCCAGA | 106 | 44.3           |
| HSP72                                                   | <i>Hspa1a</i>   | NM_010479.2    | NA                          | CAAGAACGCGCTCGAATCCTA    | TCCTGGCACTTGTCAGCAC       | 114 | 57             |
| HSP25                                                   | <i>Hspb1</i>    | NM_013560.2    | NA                          | TCCCTGGACGTCACCACTTC     | AGAGATGTAGCCATGTTCTGCTCTG | 114 | 56.1           |
| Pax-7                                                   | <i>Pax7</i>     | NM_011039.2    | NA                          | ACTTCAAGCAGGTGACATCCACA  | ACCTCACGGGCAGATCATT       | 93  | 54.8           |
| NF-κB                                                   | <i>Nfkb1</i>    | NM_008689.2    | NA                          | TGCATATAGCGGCCGGAAG      | CCCAAGAGTCGTCCAGGTCATAG   | 114 | 57.9           |
| Interleukin 6                                           | <i>IL6</i>      | NM_031168.1    | NA                          | CCACTTCACAAGTCGGAGGCTTA  | GCAAGTGATCATCGTTGTTTCATAC | 112 | 42             |
| Chloride channel 1                                      | <i>Clcn1</i>    | NM_013491.2    | ATTGGCTGAGACACTTGT          | TCATGCTCGGTGTCCGAAA      | CAGGCGGTGCTTAGCAAGA       | 192 | NA             |
| Sodium channel type IV                                  | <i>Scn4a</i>    | NM_133199.2    | Mm_01258366_m1 <sup>b</sup> | Unknown                  | Unknown                   | 88  | NA             |
| Sodium channel type V                                   | <i>Scn5a</i>    | NM_021544.3    | Mm_01342505_m1 <sup>b</sup> | Unknown                  | Unknown                   | 85  | NA             |
| Sodium channel type I β                                 | <i>Scn1b</i>    | NM_011322.2    | Mm_00441210_m1 <sup>b</sup> | Unknown                  | Unknown                   | 86  | NA             |
| Ca <sup>2+</sup> -activated K <sup>+</sup> channel (BK) | <i>Kcnma1</i>   | NM_010610      | CAGAGTCCTGGTTGTGTTA         | GATATCCGCCCAGACACTGACT   | AGTATATTACGAGGGCACCAATGC  |     | NA             |
| ATP-sensitive K <sup>+</sup> channel, Kir6.2            | <i>Kcnj11</i>   | NM_010602.2    | CTGGCTCCTAGTGACCTG          | CTCATCATCTACCACGTCATCGA  | GTTTCTACCACGCTTCCAAGA     | 116 | NA             |
| ATP-sensitive K <sup>+</sup> channel SUR2A              | <i>Abcc9</i>    | NM_021041.2    | CATAGCTCATCGGGTTC           | CGGATCGCACGGTCGTA        | TAACCAGGTCTGCAGTCAGAATG   |     | NA             |
| ATP-sensitive K <sup>+</sup> channel, SUR1              | <i>Abcc8</i>    | NM_011510.3    | Mm_01701349_m1 <sup>b</sup> | Unknown                  | Unknown                   | 82  | NA             |
| PK C, α                                                 | <i>Prkca</i>    | NM_011101.3    | Mm_00440858_m1 <sup>b</sup> | Unknown                  | Unknown                   | 75  | NA             |
| PKC, δ                                                  | <i>Prkcd</i>    | NM_011101.3    | Mm_00440891_m1 <sup>b</sup> | Unknown                  | Unknown                   | 58  | NA             |
| PK C, θ                                                 | <i>Prkcg</i>    | NM_008859.2    | Mm_00435796_m1 <sup>b</sup> | Unknown                  | Unknown                   | 106 | NA             |
| PK C, ε                                                 | <i>Prkce</i>    | NM_011104.3    | Mm_00440894_m1 <sup>b</sup> | Unknown                  | Unknown                   | 64  | NA             |
| IGF-1 class 1                                           | <i>Igf1</i>     | NM_001111275.1 | Mm_01233960_m1 <sup>b</sup> | Unknown                  | Unknown                   | 84  | NA             |
| IGF-1 class 1                                           | <i>Igf1</i>     | NM_010512.4    | Mm_01233960_m1 <sup>b</sup> | Unknown                  | Unknown                   | 84  | NA             |
| IGF-1 Ea                                                | <i>Igf1</i>     | NM_001111275.1 | Mm_00710307_m1 <sup>b</sup> | Unknown                  | Unknown                   | 68  | NA             |
| IGF-1 Ea                                                | <i>Igf1</i>     | NM_001111276.1 | Mm_00710307_m1 <sup>b</sup> | Unknown                  | Unknown                   | 68  | NA             |

<sup>a</sup>, see text for full names; <sup>b</sup>, reference number from Applied Biosystems; NA, not applicable
